# Supplementary material for: Reproducing pyroclastic density current deposits of the 79 CE eruption of the Somma–Vesuvius volcano using the box-model approach
Source: Copernicus journal article supplement (doi:10.5194/se-12-119-2021), 2021-01-20
Supplement: Supplementary file 1 [file se-12-119-2021-supplement.pdf]

Supplement of Solid Earth, 12, 119–139, 2021  
<https://doi.org/10.5194/se-12-119-2021-supplement>  
© Author(s) 2021. This work is distributed under  
the Creative Commons Attribution 4.0 License.

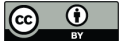

*Supplement of*

## **Reproducing pyroclastic density current deposits of the 79 CE eruption of the Somma–Vesuvius volcano using the box-model approach**

**Alessandro Tadini et al.**

*Correspondence to:* Alessandro Tadini ([alessandro.tadini@uca.fr](mailto:alessandro.tadini@uca.fr))

The copyright of individual parts of the supplement might differ from the CC BY 4.0 License.

| <b>EU3pf</b>                                    |                                   | <b>Φ</b>    |             |             |             |             |             |             |             |             |             |
|-------------------------------------------------|-----------------------------------|-------------|-------------|-------------|-------------|-------------|-------------|-------------|-------------|-------------|-------------|
|                                                 |                                   | <b>-4</b>   | <b>-3</b>   | <b>-2</b>   | <b>-1</b>   | <b>0</b>    | <b>1</b>    | <b>2</b>    | <b>3</b>    | <b>4</b>    | <b>5</b>    |
| Juveniles                                       | Mean Density (kg/m <sup>3</sup> ) | 810         | 805         | 955         | 860         | 970         | 1600        | 2350        | 2550        | 2550        | 2600        |
|                                                 | Mean wt%                          | 51.73       | 66.68       | 63.26       | 55.21       | 45.93       | 41.33       | 37.37       | 100         | 100         | 100         |
| Lithics                                         | Mean Density (kg/m <sup>3</sup> ) | 2614        | 2614        | 2614        | 2614        | 2614        | 2614        | 2614        | 2614        | 2614        | 2614        |
|                                                 | Mean wt%                          | 48.27       | 33.32       | 36.49       | 42.29       | 45.08       | 41.27       | 36.59       | 0           | 0           | 0           |
| Crystals                                        | Mean Density (kg/m <sup>3</sup> ) | 2800        | 2800        | 2800        | 2800        | 2800        | 2800        | 2800        | 2800        | 2800        | 2800        |
|                                                 | Mean wt%                          | 0           | 0           | 0.25        | 2.5         | 8.98        | 17.4        | 26.05       | 0           | 0           | 0           |
| <b>WEIGHTED MEAN DENSITY (kg/m<sup>3</sup>)</b> |                                   | <b>1681</b> | <b>1408</b> | <b>1565</b> | <b>1650</b> | <b>1874</b> | <b>2160</b> | <b>2541</b> | <b>2550</b> | <b>2550</b> | <b>2600</b> |
| <b>EU4b/c</b>                                   |                                   | <b>Φ</b>    |             |             |             |             |             |             |             |             |             |
|                                                 |                                   | <b>-4</b>   | <b>-3</b>   | <b>-2</b>   | <b>-1</b>   | <b>0</b>    | <b>1</b>    | <b>2</b>    | <b>3</b>    | <b>4</b>    | <b>5</b>    |
| Juveniles                                       | Mean Density (kg/m <sup>3</sup> ) | 810         | 805         | 955         | 860         | 970         | 1600        | 2350        | 2550        | 2550        | 2600        |
|                                                 | Mean wt%                          | 42.05       | 59.81       | 48.86       | 43.53       | 47.48       | 49.3        | 41.22       | 47.55       | 55.47       | 100         |
| Lithics                                         | Mean Density (kg/m <sup>3</sup> ) | 2614        | 2614        | 2614        | 2614        | 2614        | 2614        | 2614        | 2614        | 2614        | 2614        |
|                                                 | Mean wt%                          | 57.95       | 40.19       | 50.69       | 56.02       | 49.56       | 46.89       | 51.13       | 47.85       | 38.54       | 0           |
| Crystals                                        | Mean Density (kg/m <sup>3</sup> ) | 2800        | 2800        | 2800        | 2800        | 2800        | 2800        | 2800        | 2800        | 2800        | 2800        |
|                                                 | Mean wt%                          | 0           | 0           | 0.46        | 0.45        | 2.96        | 3.81        | 7.65        | 4.59        | 5.99        | 0           |
| <b>WEIGHTED MEAN DENSITY (kg/m<sup>3</sup>)</b> |                                   | <b>1855</b> | <b>1532</b> | <b>1804</b> | <b>1851</b> | <b>1839</b> | <b>2103</b> | <b>2519</b> | <b>2495</b> | <b>2590</b> | <b>2600</b> |
